# Supplementary material for: Measurement Report: Unraveling PM 10 Sources and Oxidative Potential Across Chinese Regions: Insights Analysis Based on CNN-LSTM and Receptor Model
Source: Copernicus journal article supplement (doi:10.5194/egusphere-2025-626), 2025-05-20
Supplement: Supplementary file 1 [file egusphere-2025-626-supplement.pdf]

## **Supplement of**

# **Measurement Report: Unraveling PM<sub>10</sub> Sources and Oxidative Potential Across Chinese Regions Insights Analysis Based on CNN-LSTM and Receptor Model**

Qinghe Cai<sup>1</sup>, Dongqing Fang<sup>2,3</sup>, Junli Jin<sup>3</sup>, Xiaoyu Hu<sup>4</sup>, Yuxuan Cao<sup>1</sup>, Tianyi Zhao<sup>1,5</sup>, Yang Bai<sup>1</sup>, Yang Zhang<sup>1,6</sup>

<sup>1</sup>College of Resources and Environment, University of Chinese Academy of Sciences, Beijing, 100049, China

<sup>2</sup>Key Laboratory of Urban Meteorology, China Meteorological Administration, Beijing 100089, China

<sup>3</sup>Meteorological Observation Center, China Meteorological Administration, Beijing, 100081, China

<sup>4</sup>City University of Hong Kong, Hongkong, 999077, China

<sup>5</sup>Guangzhou Institute of Geochemistry, Chinese Academy of Sciences, Guangzhou, 510640, China

<sup>6</sup>Beijing Yanshan Earth Critical Zone National Research Station, Beijing, 101408, China

*Correspondence to:* Dongqing Fang (fangdongqing@163.com) and Yang Zhang (zhangyang@ucas.ac.cn)

## S1 Comparison between Northern and Southern sites of $OP_v$ ( $\text{nmol H}_2\text{O}_2 \cdot \text{m}^{-3}$ )

Due to the non-normal distribution of the data, a non-parametric Mann-Whitney U test was conducted to examine regional differences in ROS concentrations. The analysis revealed that  $OP_v$  levels were significantly higher in the Northern sites compared to the Southern sites ( $U = 168517.0$ ,  $p = 0.025$ ), with the difference exceeding the threshold for statistical significance ( $p < 0.05$ ).

Table S1. The geographical division corresponding to the station.

| Geographic region | Station name            |
|-------------------|-------------------------|
| Northern sties    | LFS, DL, GC, DH, XA, ZZ |
| Southern sites    | LA, CD, JS, NN, CHD     |

## S2 Source profiles from the PMF

Table S2. Specific tracers used in  $PM_{10}$  source appointment in this study.

| Identified factor       | Specific tracers                                       |
|-------------------------|--------------------------------------------------------|
| Sea Salt                | $\text{Na}^+$ 、 $\text{Mg}^{2+}$ 、 $\text{Cl}^-$       |
| Dust                    | $\text{Na}^+$ 、 $\text{Mg}^{2+}$ 、 $\text{Ca}^{2+}$    |
| Traffic                 | OC, EC                                                 |
| Biomass burning         | $\text{K}^+$ 、 $\text{Cl}^-$                           |
| Secondary aerosol       | $\text{NH}_4^+$ 、 $\text{NO}_3^-$ 、 $\text{SO}_4^{2-}$ |
| Agricultural activities | $\text{K}^+$ 、 $\text{Mg}^{2+}$ 、 $\text{Ca}^{2+}$     |
| Coal combustion         | $\text{Mg}^{2+}$ 、 $\text{SO}_4^{2-}$ 、OC              |

Table S3. Summary of error estimation diagnostic with  $PM_{10}$ -PMF at NN, LFS, ZZ and GC station.

| Diagnostics                         | NN     | LFS     | ZZ      | GC      |
|-------------------------------------|--------|---------|---------|---------|
| Number of base run                  | 20     | 20      | 20      | 20      |
| $Q_{\text{robust}}$                 | 2338   | 2658.86 | 2043.86 | 2066.75 |
| $Q_{\text{true}}$                   | 2521.1 | 3160.89 | 2341.26 | 2249.16 |
| $Q_{\text{true}}/Q_{\text{robust}}$ | 1.08   | 1.18    | 1.14    | 1.09    |

|                  |         |         |         |         |
|------------------|---------|---------|---------|---------|
| DISP % dQ        | < 0.1 % | < 0.1 % | < 0.1 % | < 0.1 % |
| DISP swaps       | 0       | 0       | 0       | 0       |
| Number of BS run | 100     | 100     | 100     | 100     |
| Min. Correlation |         |         |         |         |
| R-Value:         | 0.6     | 0.6     | 0.6     | 0.6     |

---
